# Supplementary material for: Investigation of Antimicrobial, Antioxidant, and Anticancer Properties of Substituted Phenethylamine-Based Imine and Metal Complexes
Source: Research Square preprint supplement (doi:10.21203/rs.3.rs-5767315/v1), 2025-01-08
Supplement: Supplementary file 1 [file 0b3a7e5997ad4dd81866a486.docx]

**Supplementary Material**


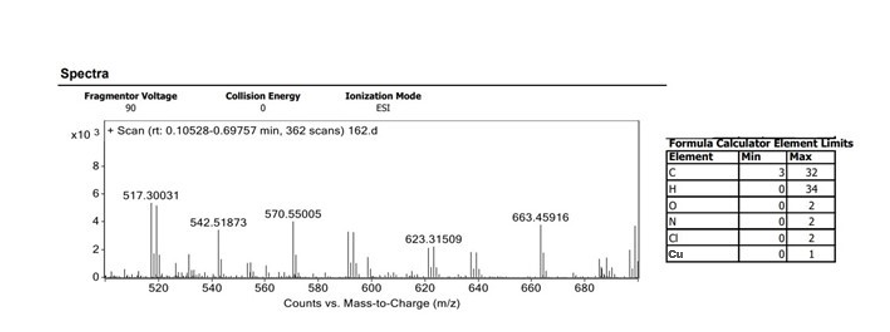


**Fig. S1.** Mass spectroscopy result of Imine-Copper Complex (4)


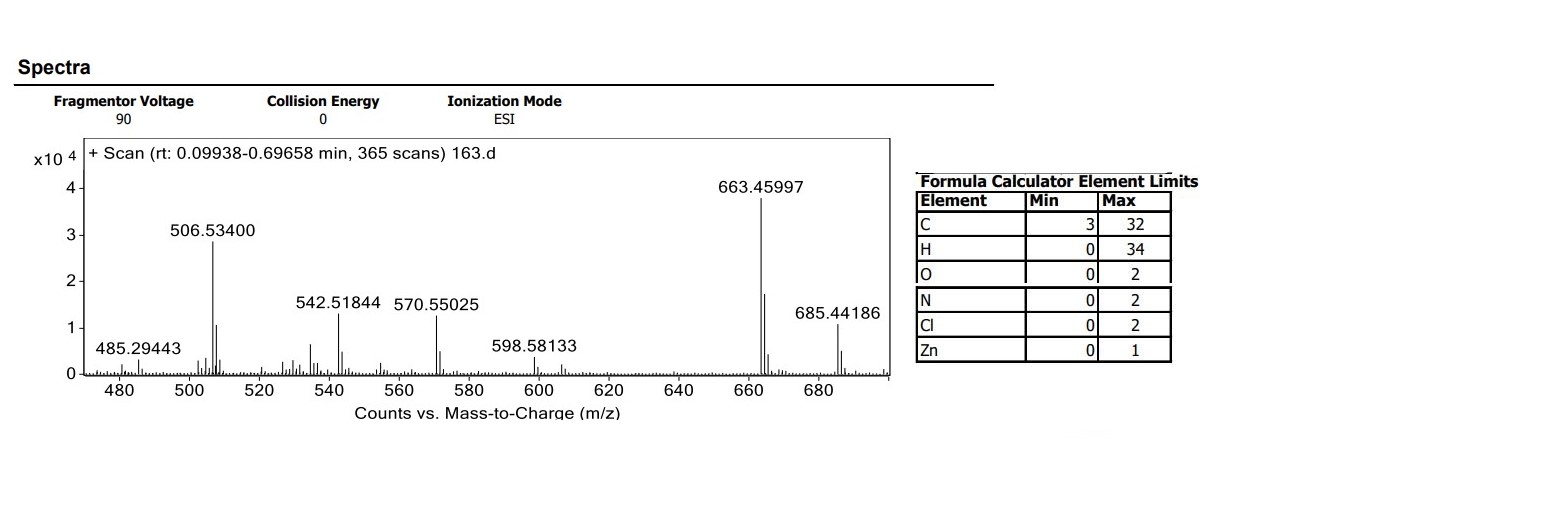


**Fig. S2.** Mass spectroscopy result of imin-Zinc Complex (5)
